# Supplementary material for: Effect of accounting for public holidays on skills of atmospheric composition model SILAM v.5.7
Source: Copernicus journal article supplement (doi:10.5194/gmd-2021-52), 2021-04-11
Supplement: Supplementary file 1 [file gmd-2021-52-supplement.pdf]

*Supplement of*

**Effect of accounting public holidays on air quality assessment and forecasting**

**Yalda Fatahi et al.**

*Correspondence to:* Yalda Fatahi (Yalda.Fatahi@fmi.fi)

### Opstations\_SpatialStats\_CO

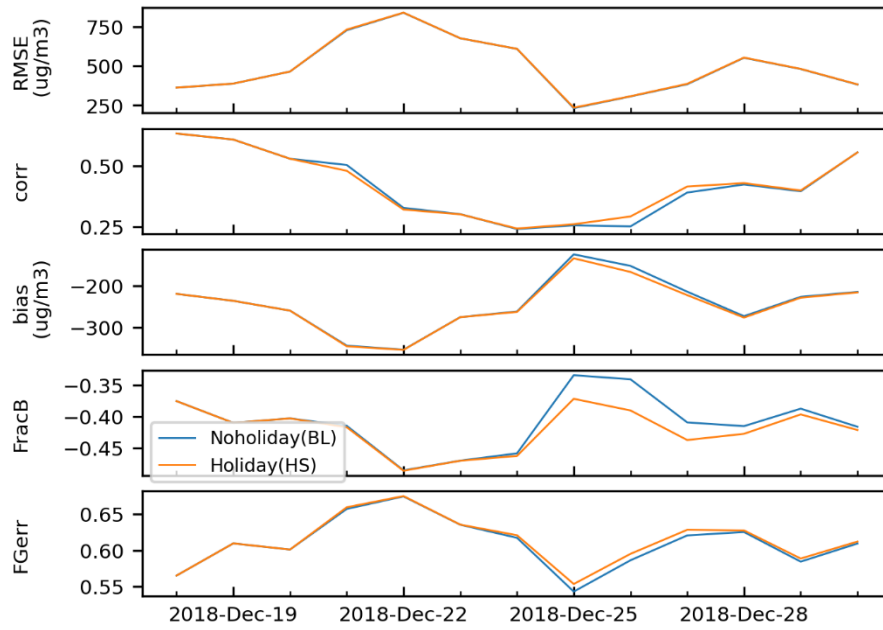

Figure S1. Spatial SILAM scores for Christmas (CO, daily mean over Europe).

### Opstations\_SpatialStats\_NOX

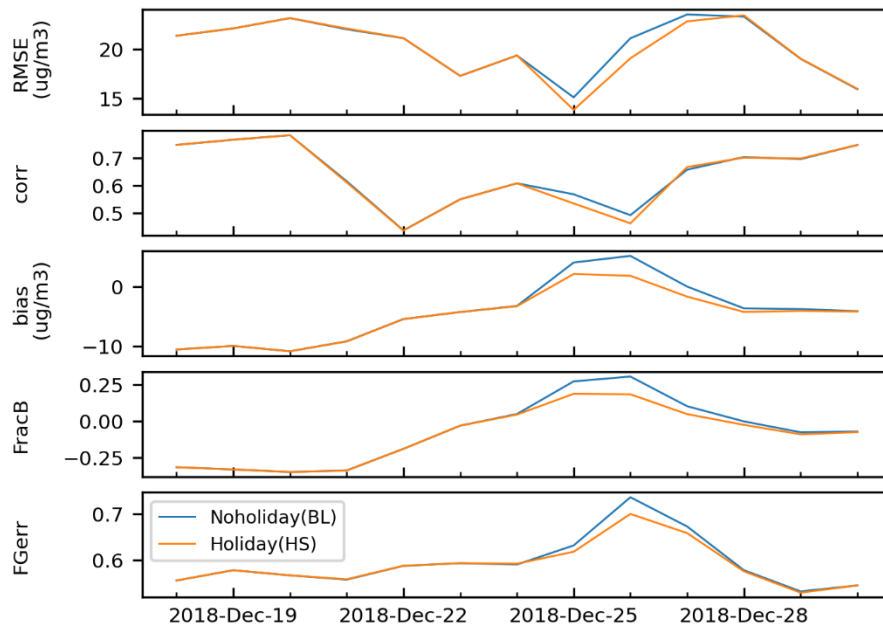

Figure S2. Spatial SILAM scores for Christmas (NO<sub>x</sub>, daily mean over Europe).

### Opstations\_SpatialStats\_PM10

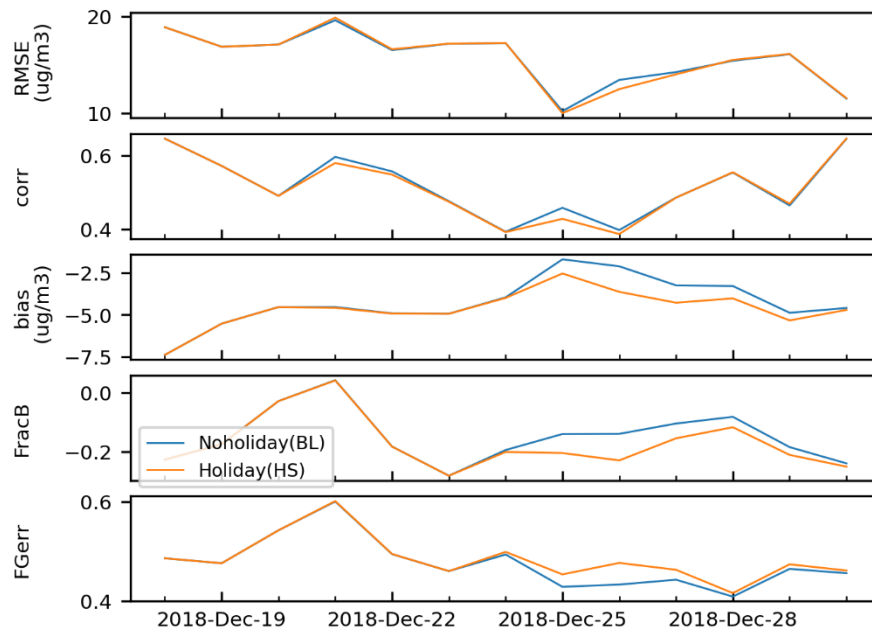

Figure S3. Spatial SILAM scores for Christmas (PM<sub>10</sub>, daily mean over Europe).

### Opstations\_SpatialStats\_O3

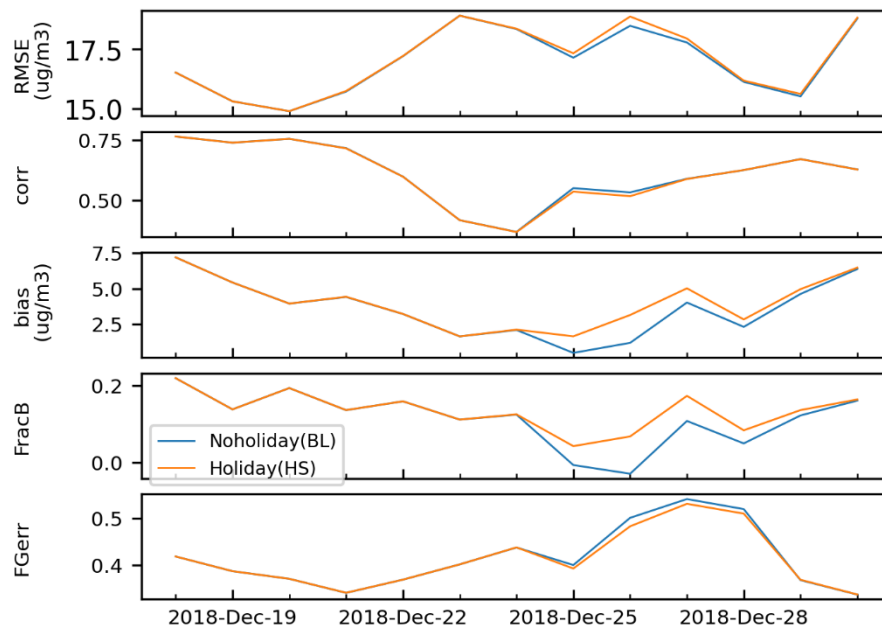

Figure S4. Spatial SILAM scores for Christmas (O<sub>3</sub>, daily mean over Europe).

### Opstations\_SpatialStats\_PM25

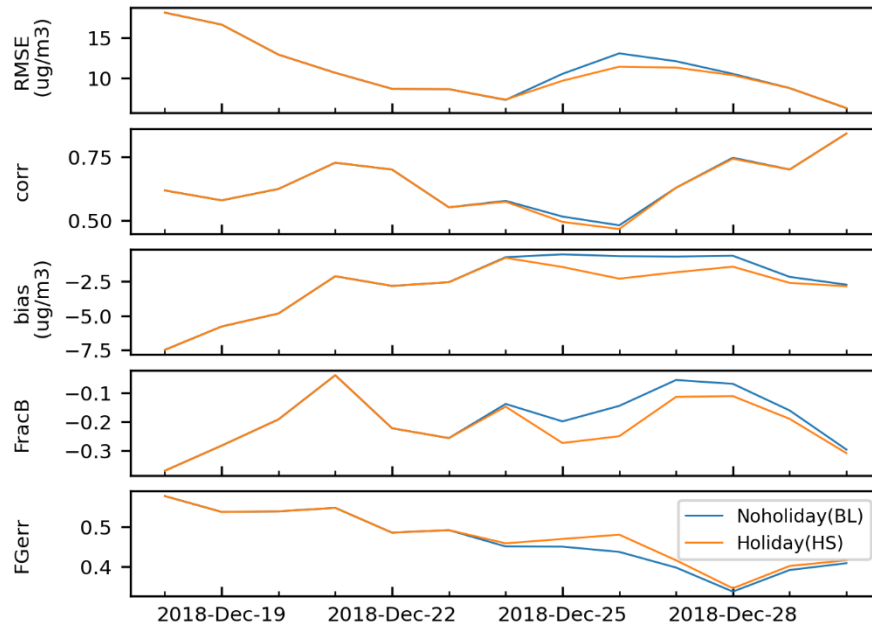

Figure S5. Spatial SILAM scores for Christmas (PM<sub>2.5</sub>, daily mean over Europe).

### Opstations\_SpatialStats\_SO2

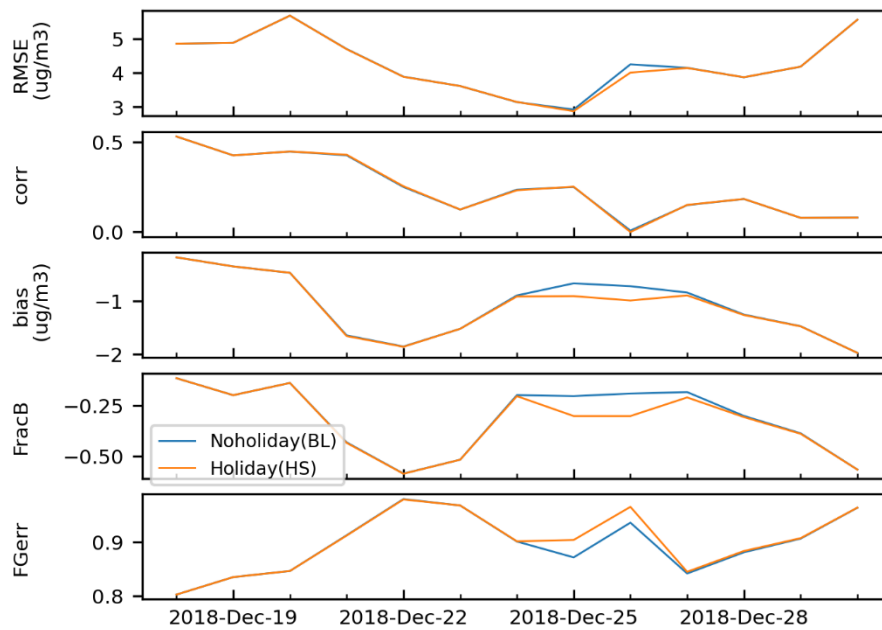

Figure S6. Spatial SILAM scores for Christmas (SO<sub>2</sub>, daily mean over Europe).

### Opstations\_SpatialStats\_CO

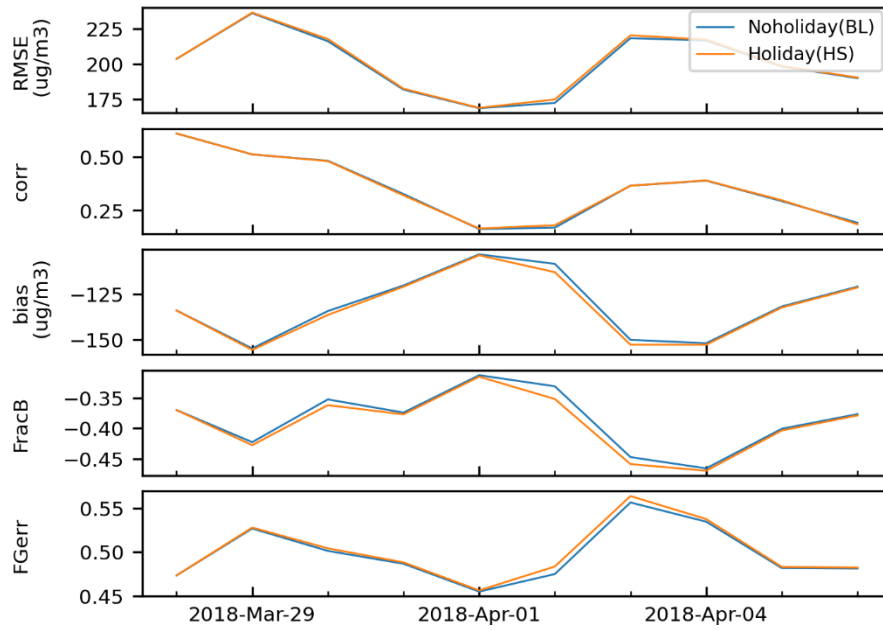

Figure S7. Spatial SILAM scores for Easter (CO, daily mean over Europe).

### Opstations\_SpatialStats\_NOX

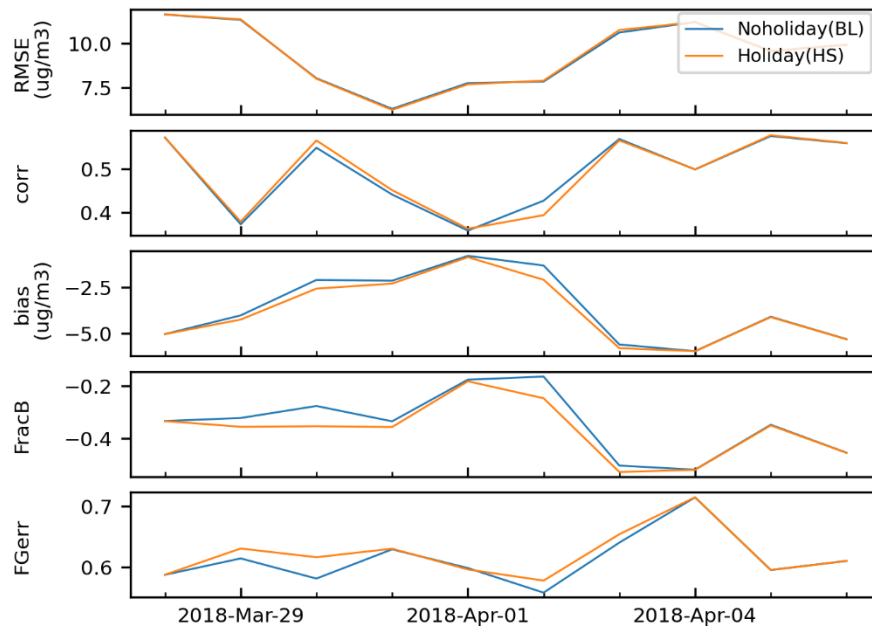

Figure S8. Spatial SILAM scores for Easter (NO<sub>x</sub>, daily mean over Europe).

### Opstations\_SpatialStats\_PM10

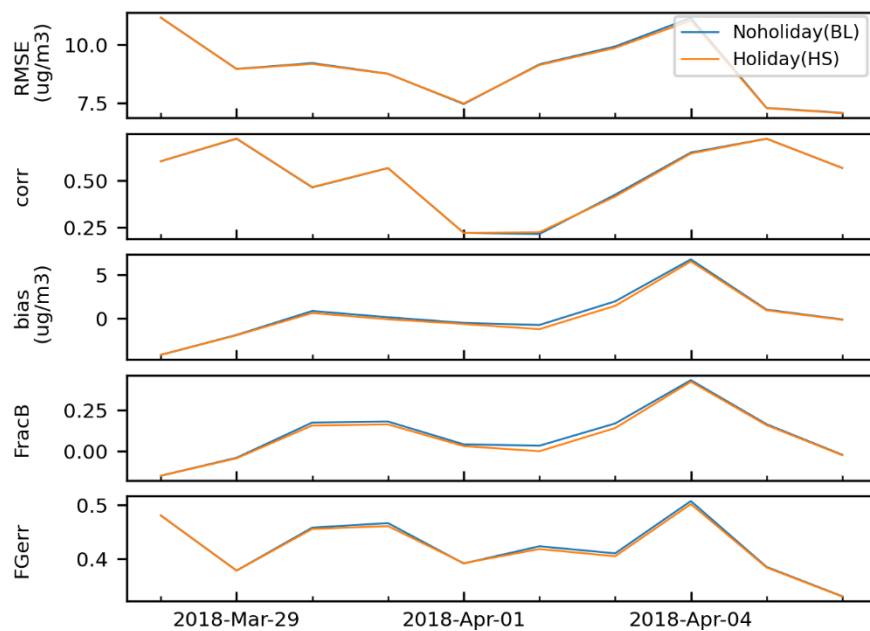

Figure S9. Spatial SILAM scores for Easter (PM<sub>10</sub>, daily mean over Europe).

### Opstations\_SpatialStats\_O3

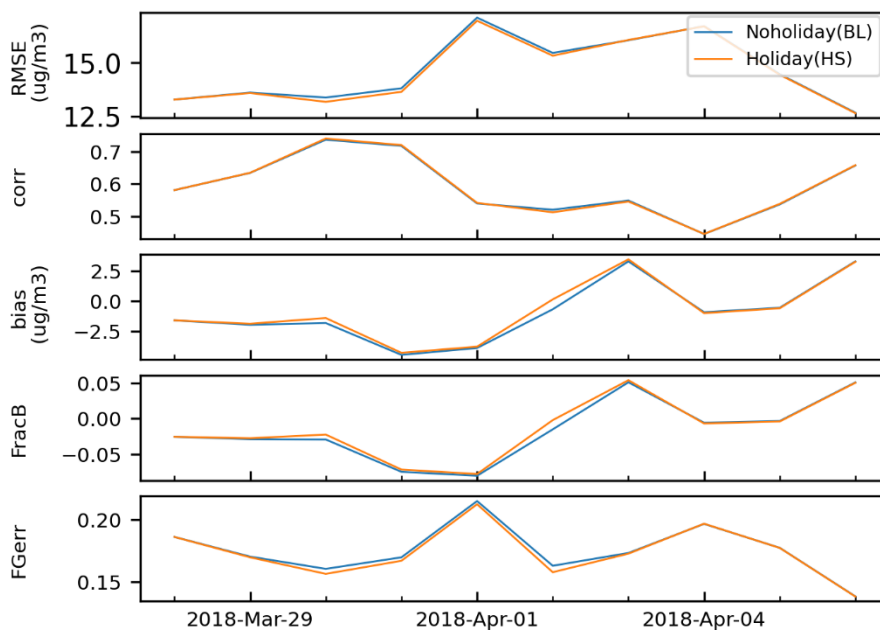

Figure S10. Spatial SILAM scores for Easter (O<sub>3</sub>, daily mean over Europe).

### Opstations\_SpatialStats\_PM25

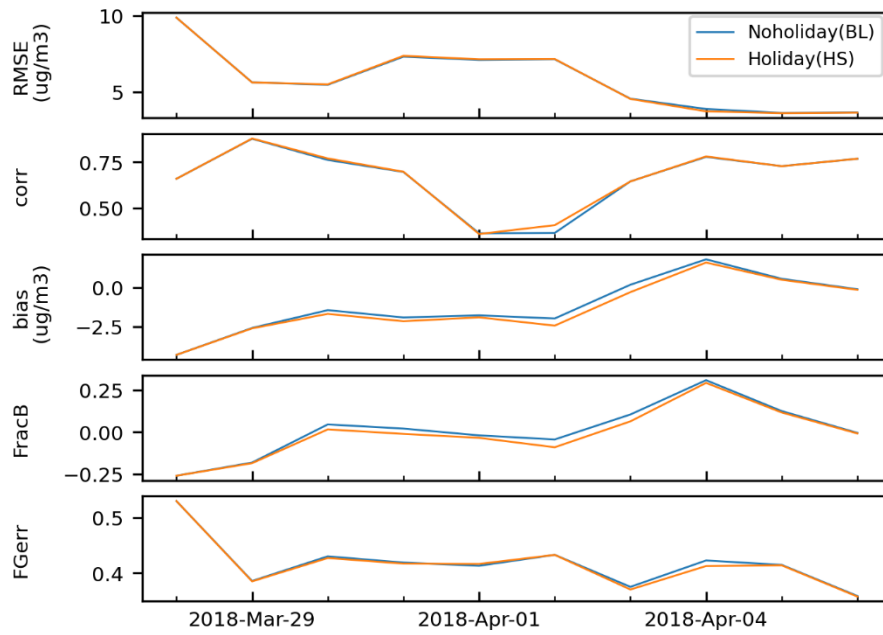

Figure S11. Spatial SILAM scores for Easter (PM<sub>2.5</sub>, daily mean over Europe).

### Opstations\_SpatialStats\_SO2

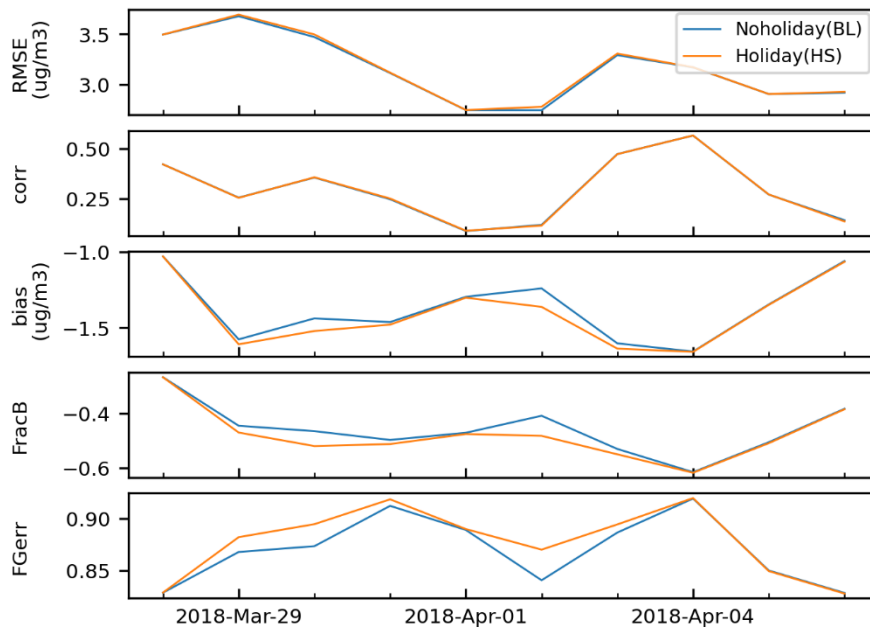

Figure S12. Spatial SILAM scores for Easter (SO<sub>2</sub>, daily mean over Europe).

### Opstations\_SpatialStats\_CO

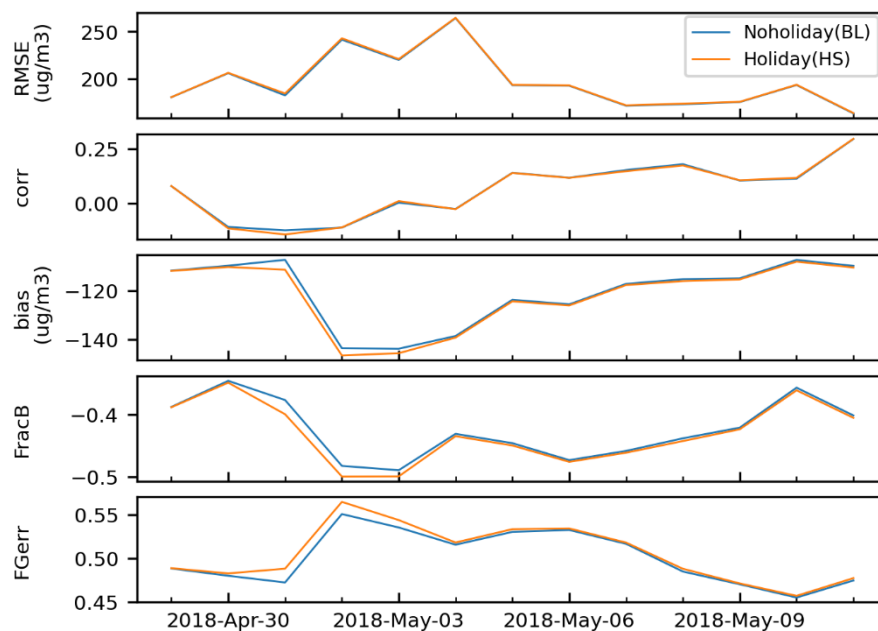

Figure S13. Spatial SILAM scores for May vacations (CO, daily mean over Europe).

### Opstations\_SpatialStats\_NOX

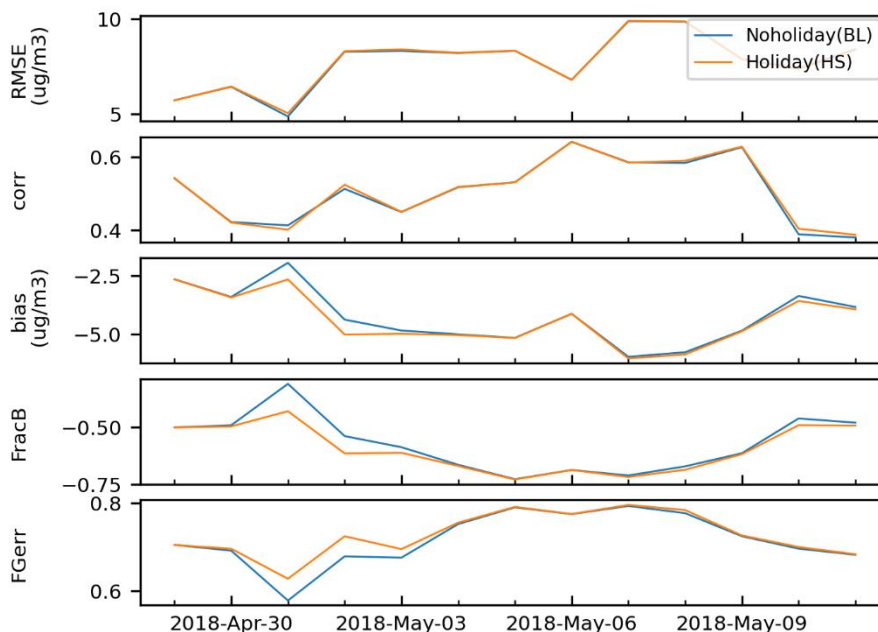

Figure S14. Spatial SILAM scores for May vacations (NO<sub>x</sub>, daily mean over Europe).

### Opstations\_SpatialStats\_PM10

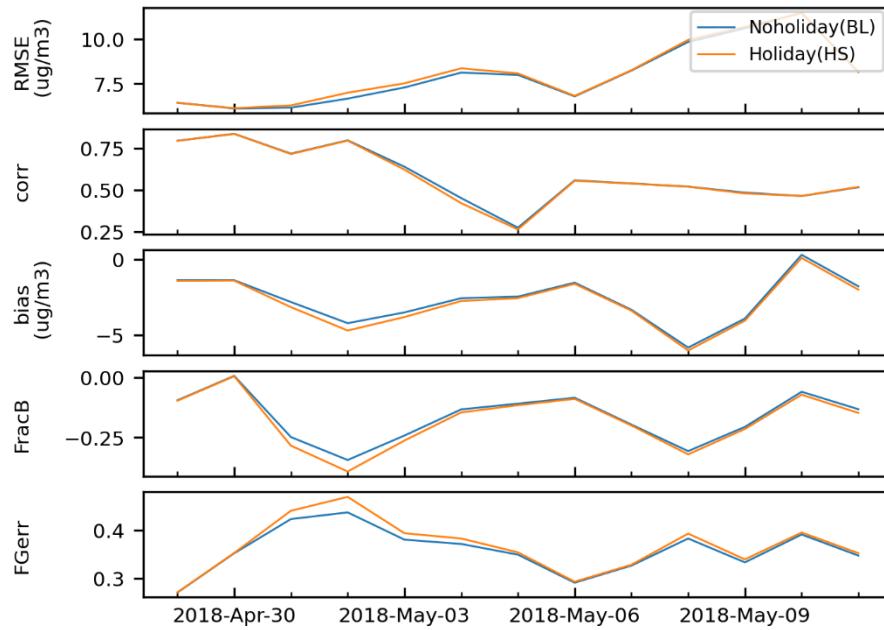

Figure S15. Spatial SILAM scores for May vacations (PM<sub>10</sub>, daily mean over Europe).

### Opstations\_SpatialStats\_O3

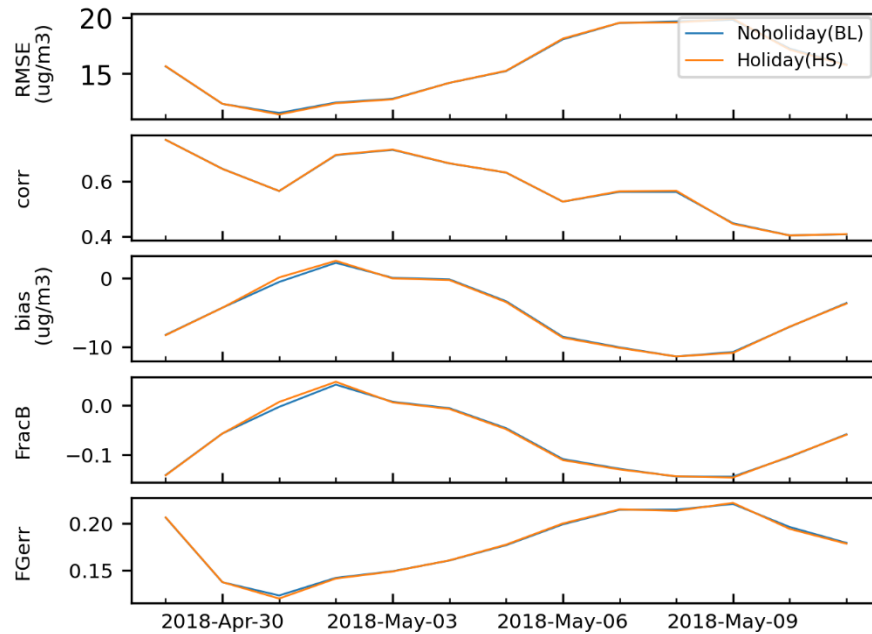

Figure S16. Spatial SILAM scores for May vacations (O<sub>3</sub>, daily mean over Europe).

### Opstations\_SpatialStats\_PM25

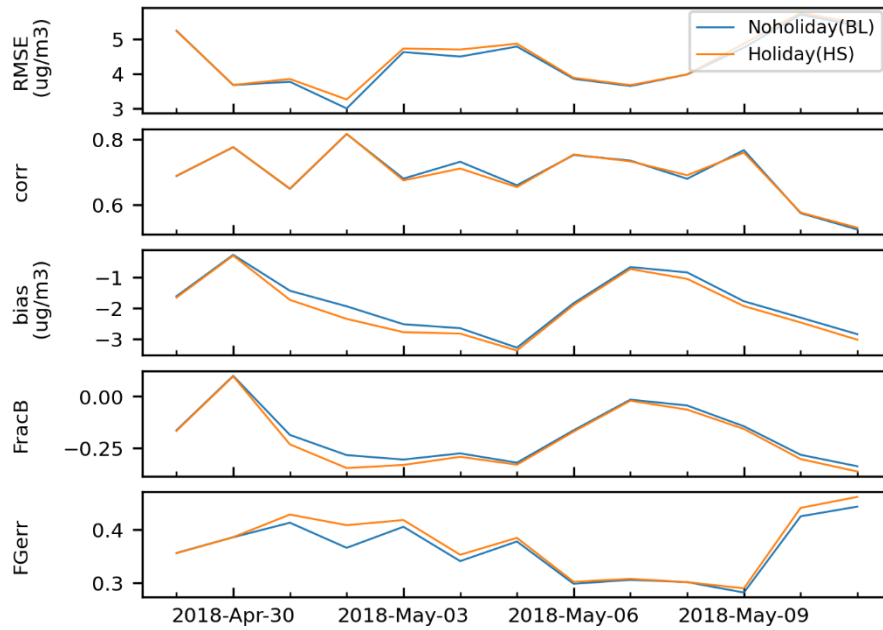

Figure S17. Spatial SILAM scores for May vacations ( $\text{PM}_{2.5}$ , daily mean over Europe).

### Opstations\_SpatialStats\_SO2

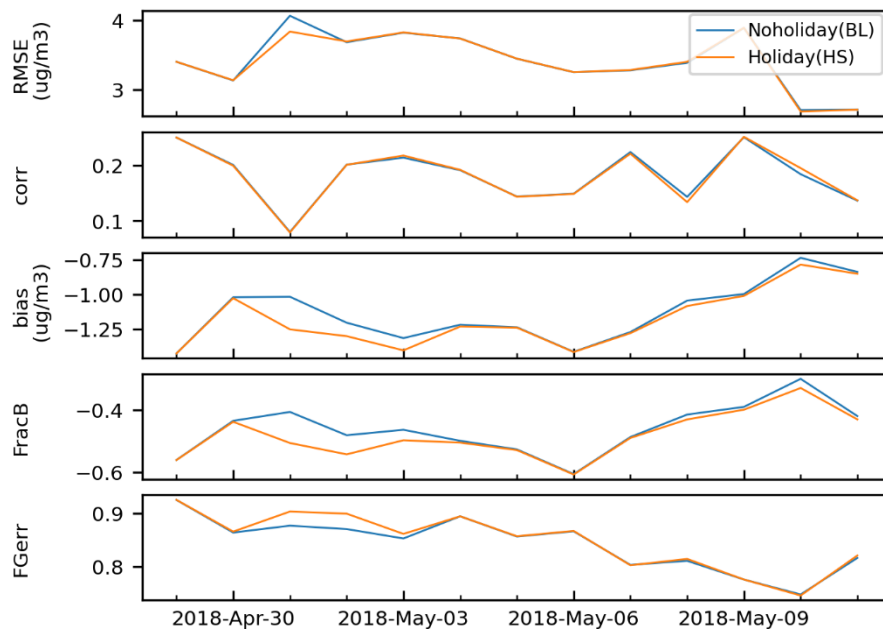

Figure S18. Spatial SILAM scores for May vacations ( $\text{SO}_2$ , daily mean over Europe).

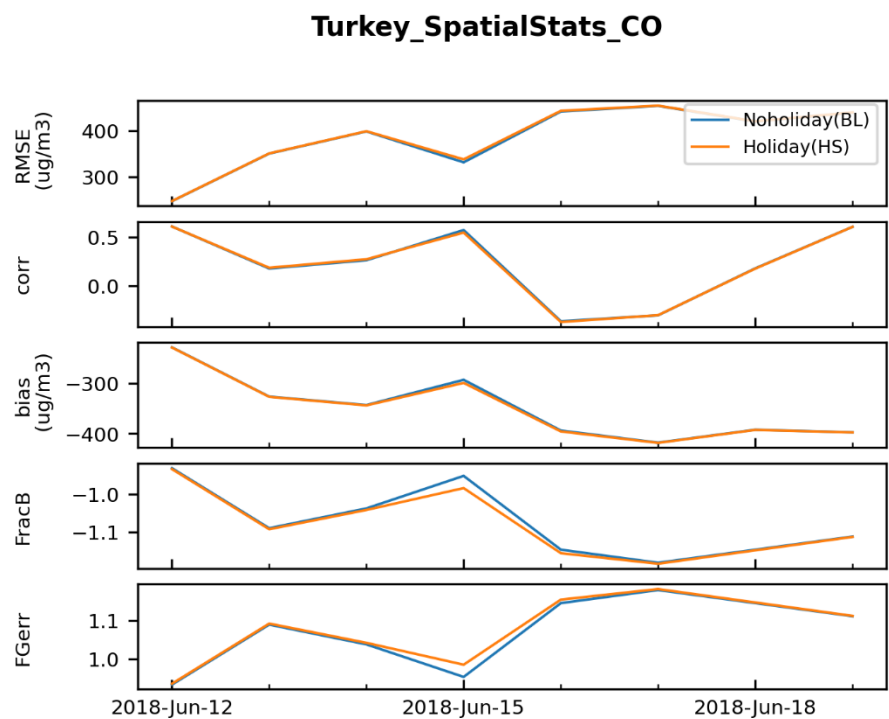

Figure S19. Spatial SILAM scores for Ramadan (CO, daily mean over Turkey).

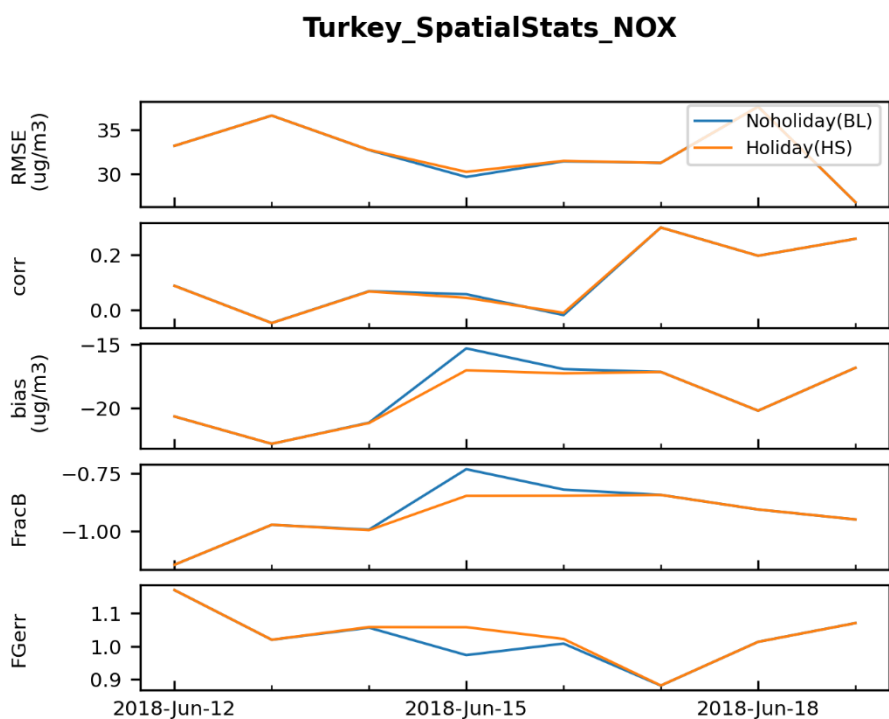

Figure S20. Spatial SILAM scores for Ramadan (NO<sub>x</sub>, daily mean over Turkey).

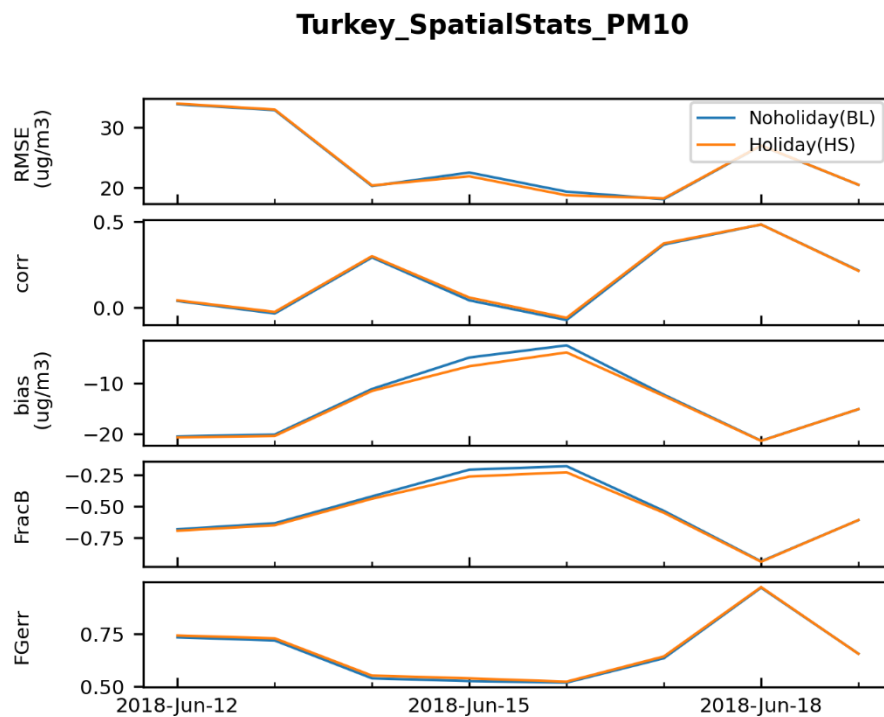

Figure S21. Spatial SILAM scores for Ramadan (PM<sub>10</sub>, daily mean over Turkey).

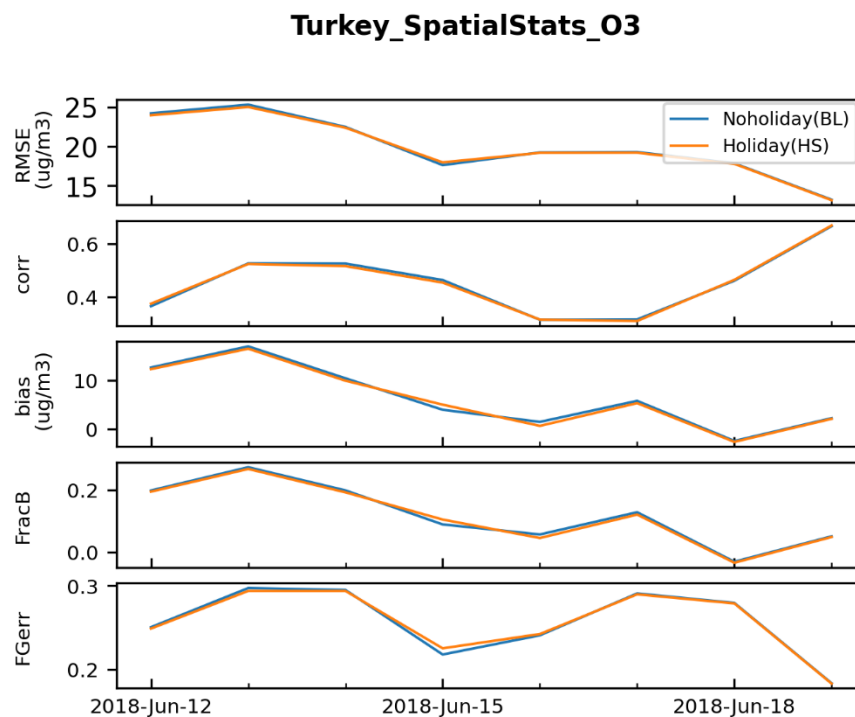

Figure S22. Spatial SILAM scores for Ramadan (O<sub>3</sub>, daily mean over Turkey).

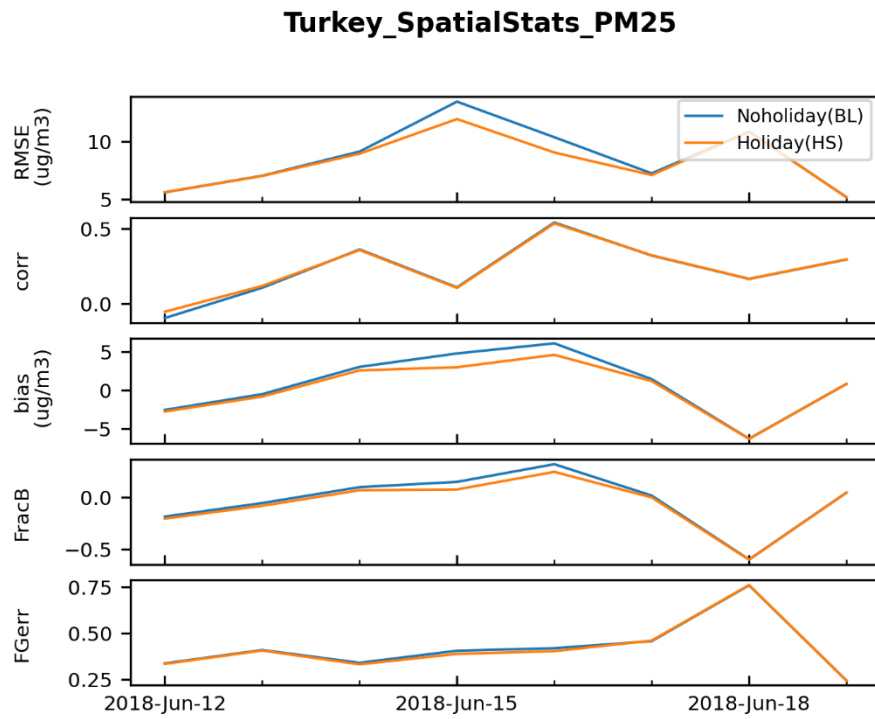

Figure S23. Spatial SILAM scores for Ramadan (PM<sub>2.5</sub>, daily mean over Turkey).

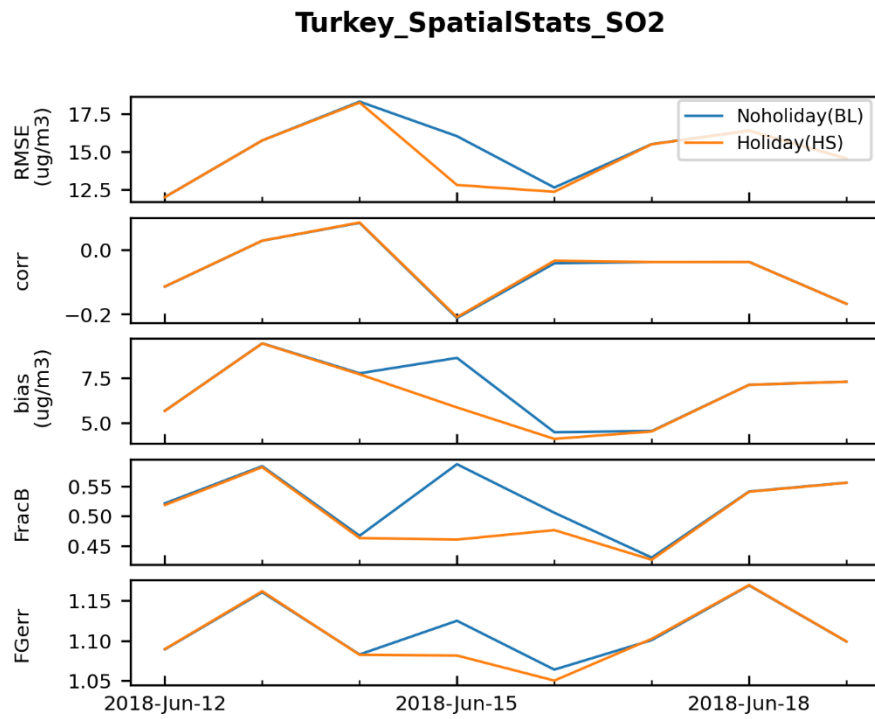

Figure S24. Spatial SILAM scores for Ramadan (SO<sub>2</sub>, daily mean over Turkey).
